# Supplementary material
Source: PubMed Central journal article supplement (PMC2278215)

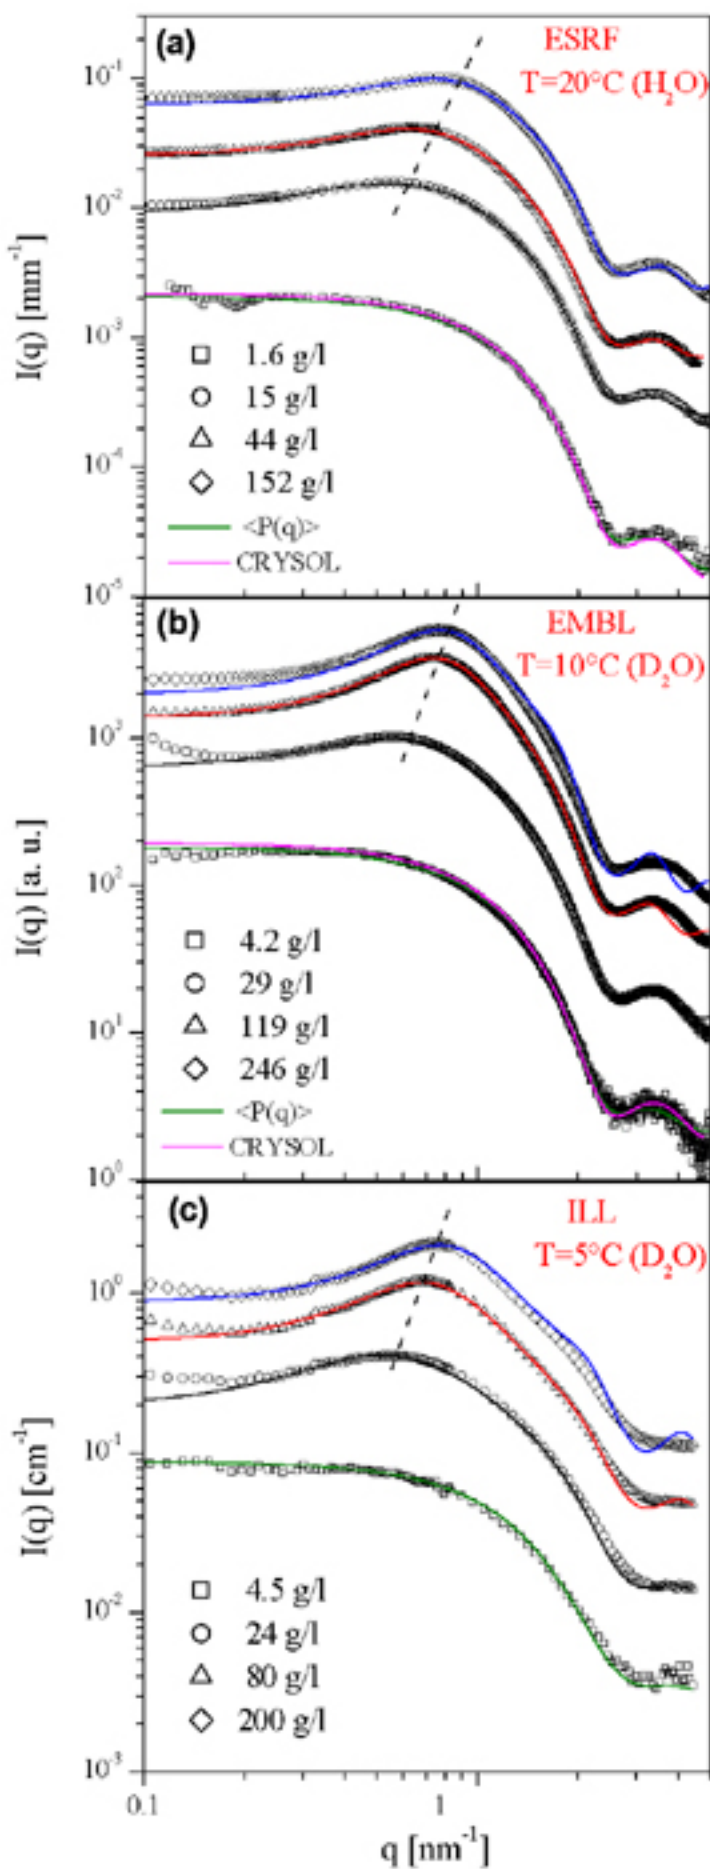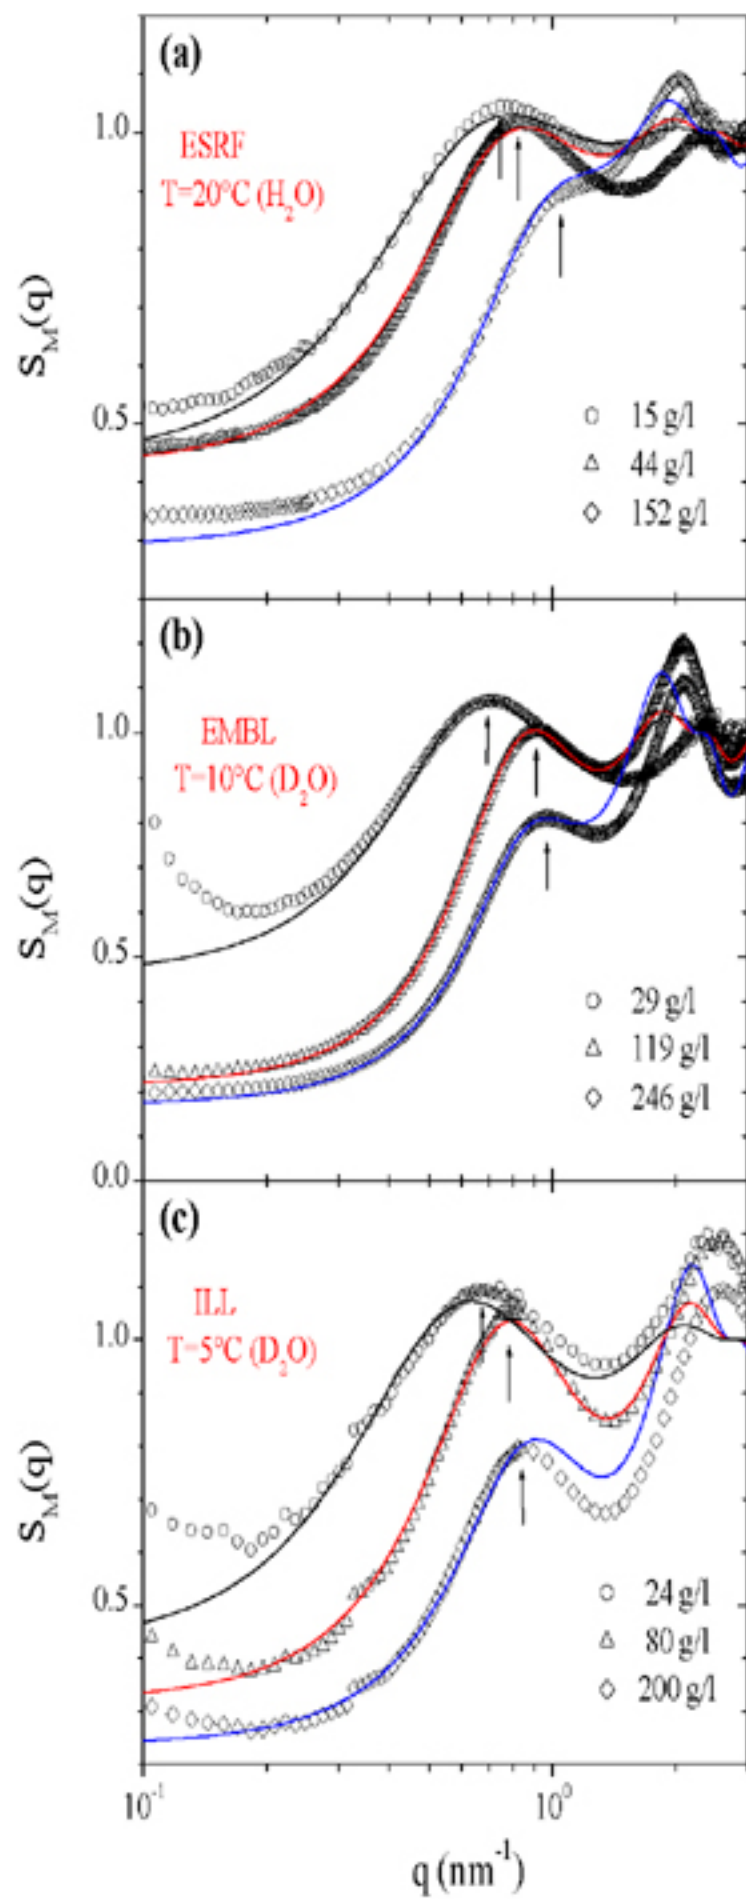

Supplement: pnas_0711928105_1.pdf [file pnas_0711928105_1.pdf]

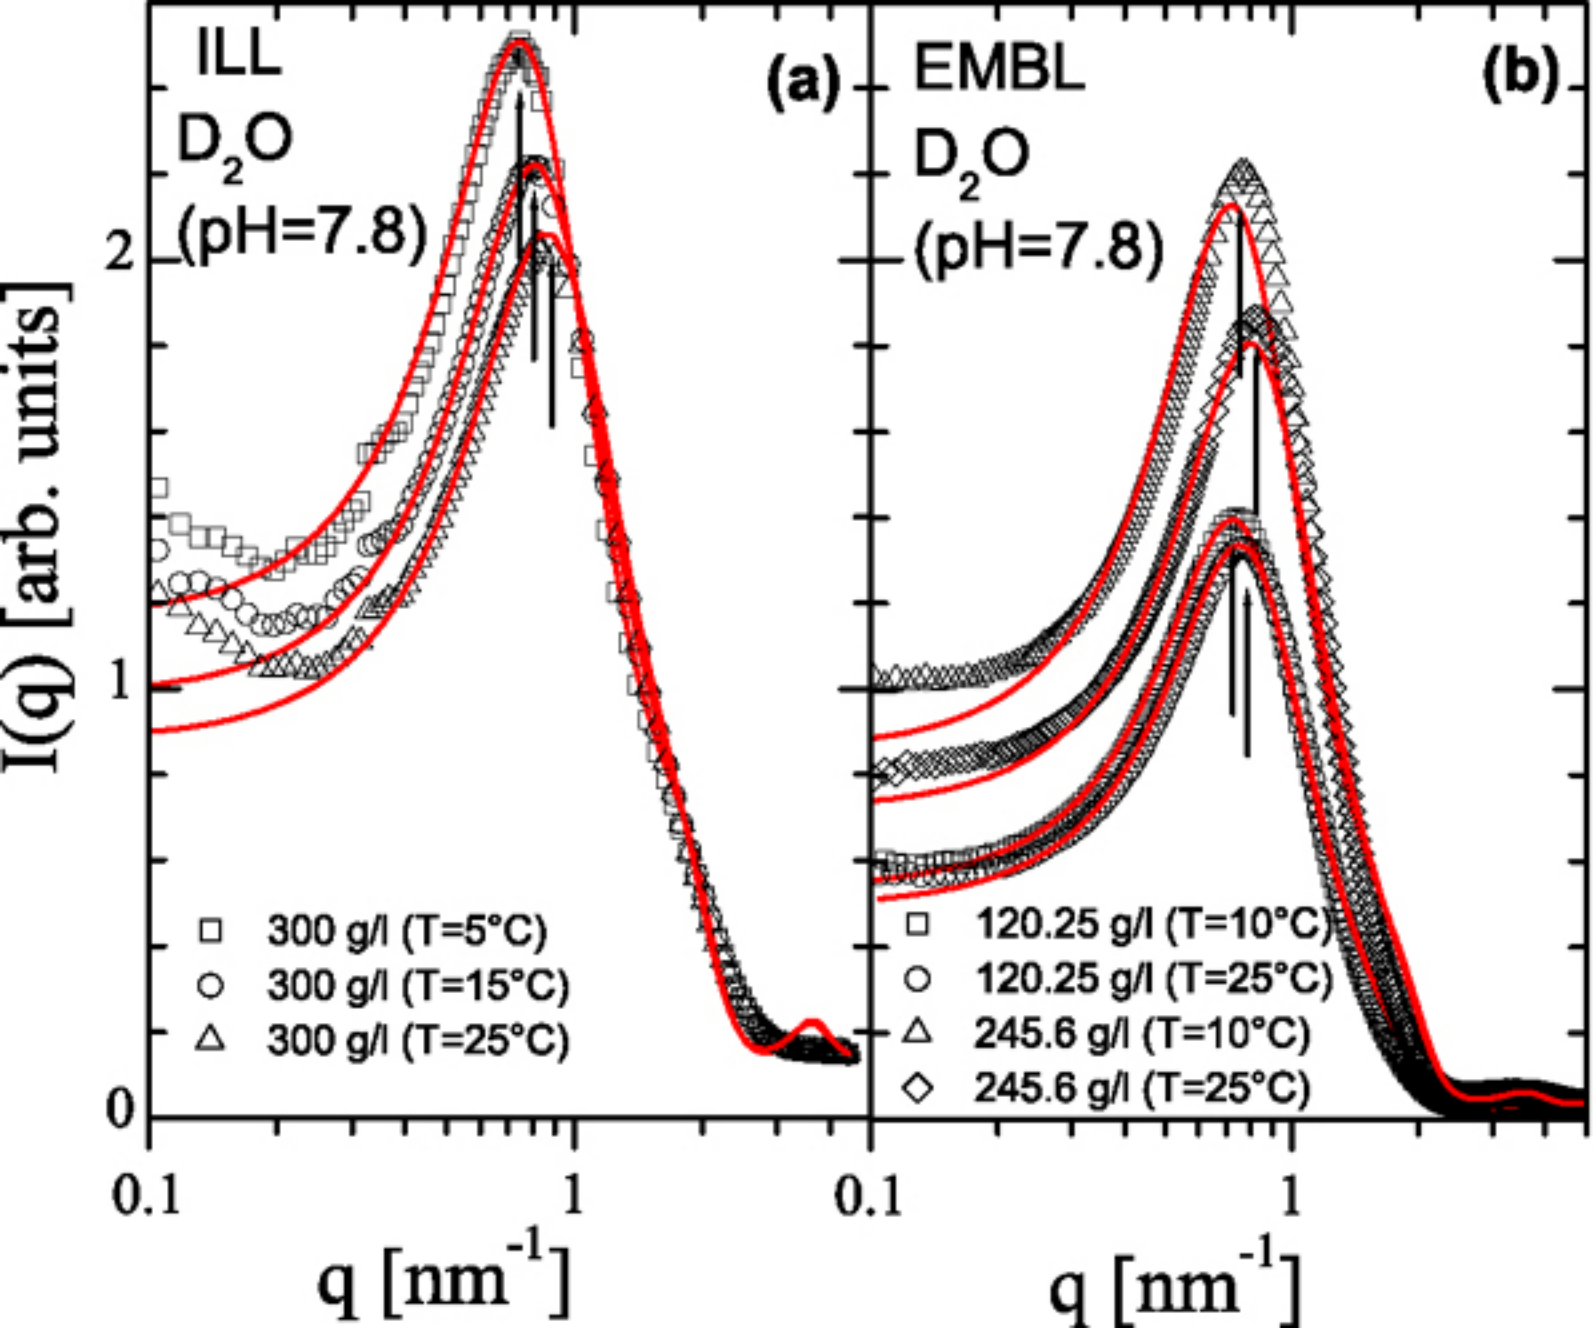

Supplement: pnas_0711928105_2.pdf [file pnas_0711928105_2.pdf]

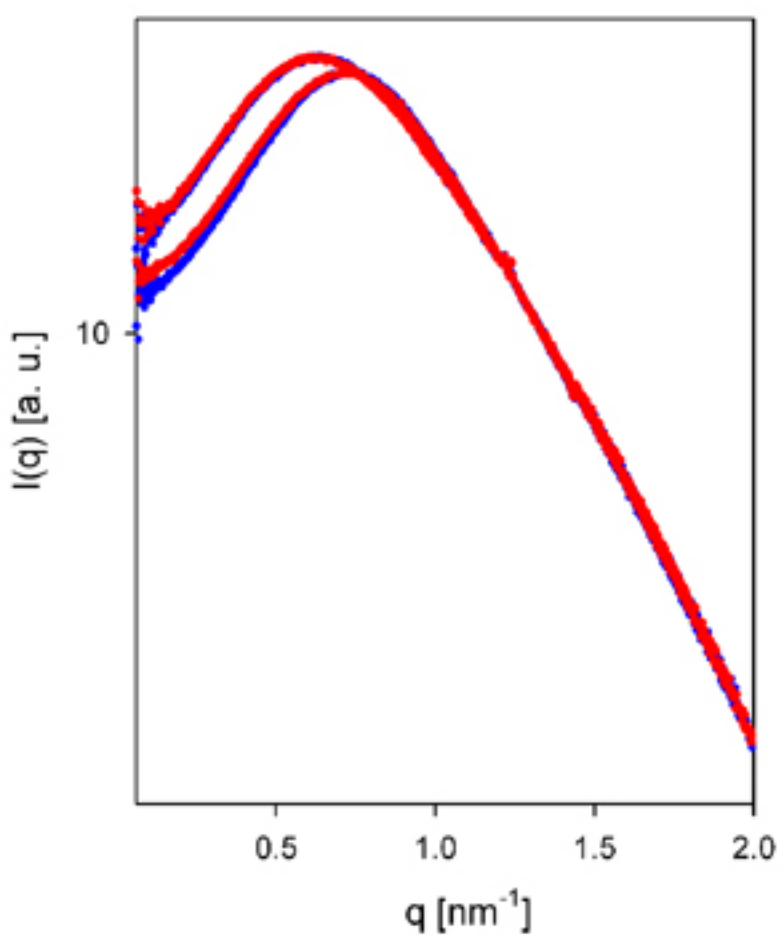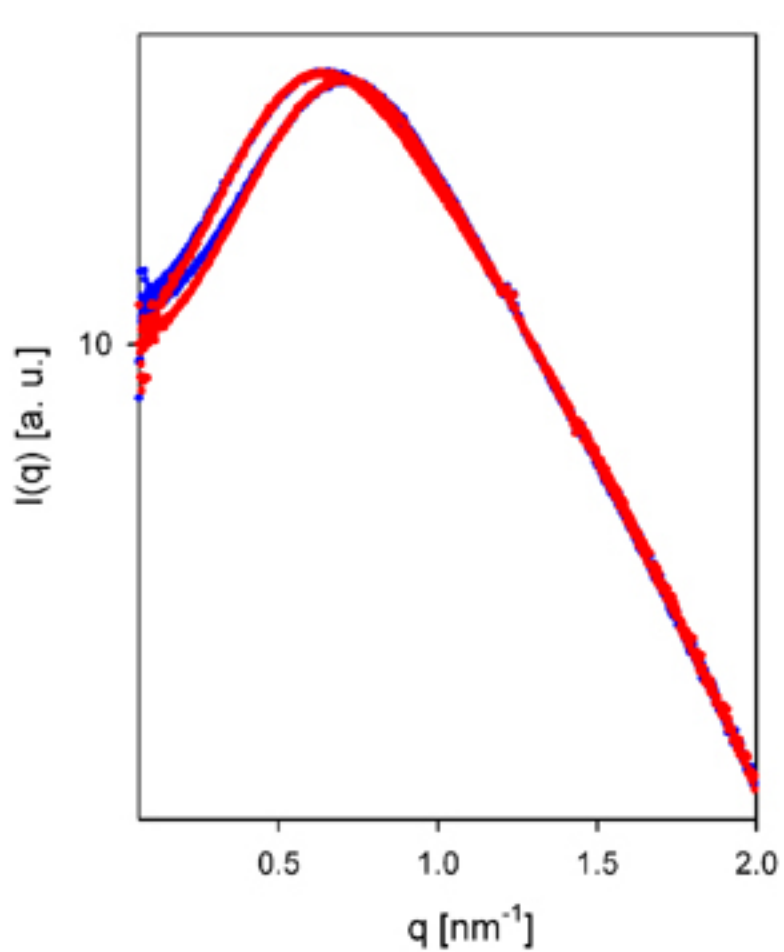

Supplement: pnas_0711928105_3.pdf [file pnas_0711928105_3.pdf]

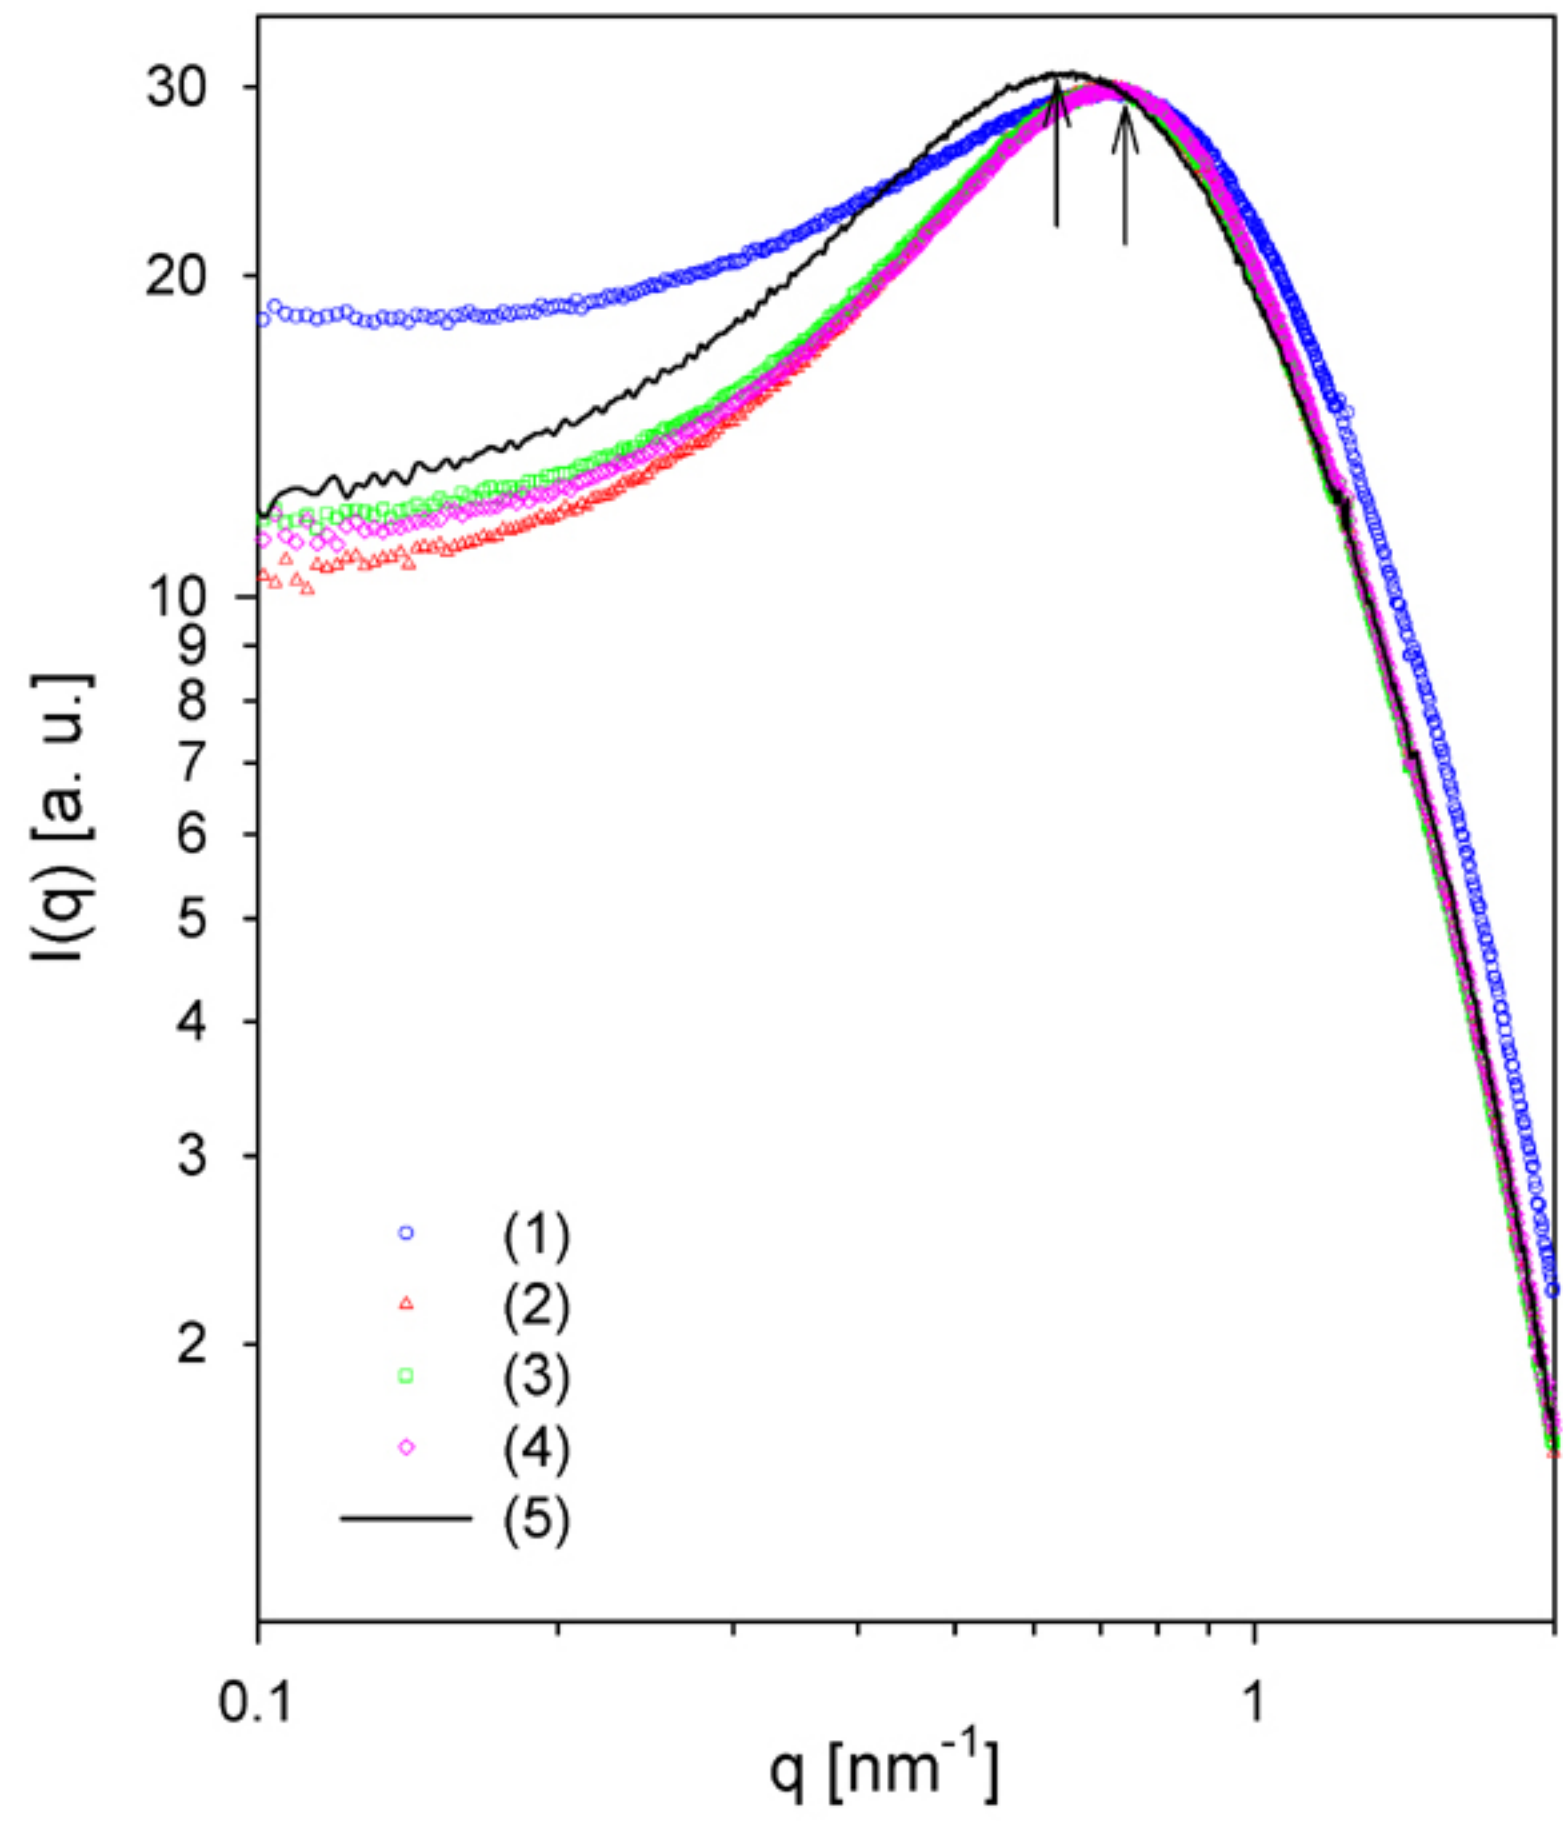

Supplement: pnas_0711928105_4.pdf [file pnas_0711928105_4.pdf]

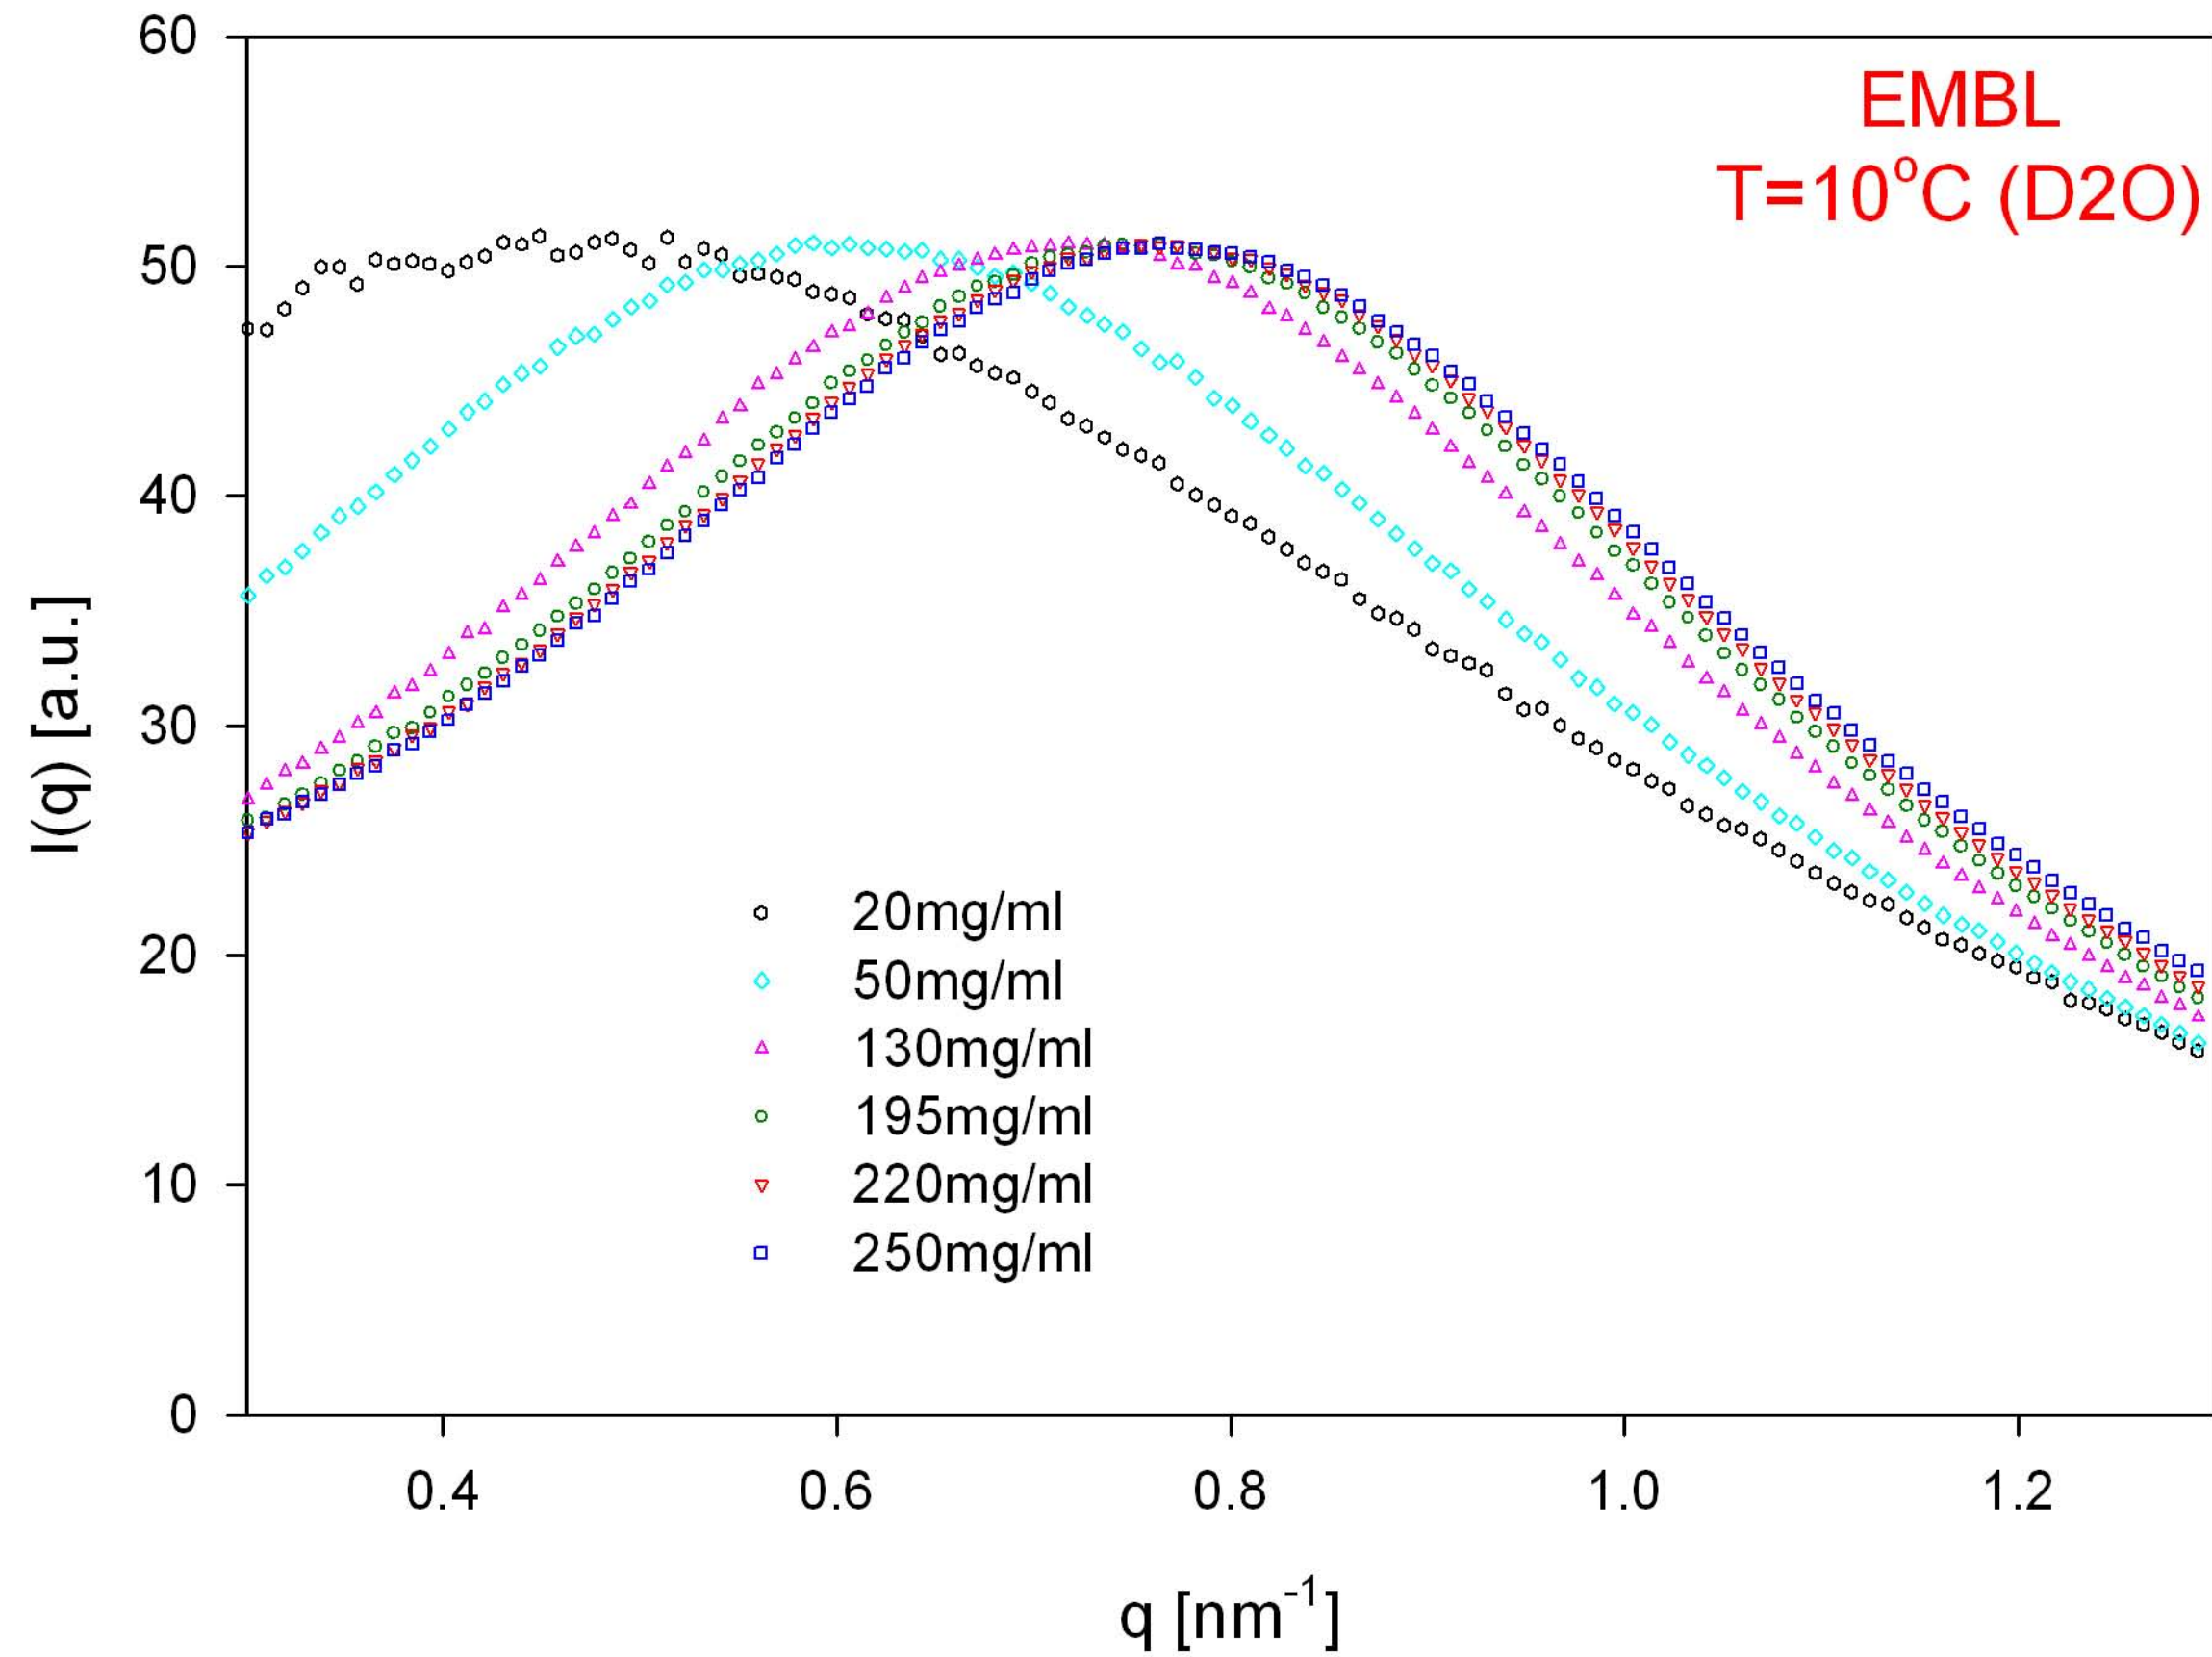

Supplement: pnas_0711928105_5.pdf [file pnas_0711928105_5.pdf]
